# Supplementary material for: Four ternary silicides in the La–Ni–Si system: from polyanionic layers to frameworks
Source: Royal Society of Chemistry journal article supplement (doi:10.1039/d2ce01007k), 2022-01-01
Supplement: d2ce01007k1.pdf [file d2ce01007k1.pdf]

## Supporting Information

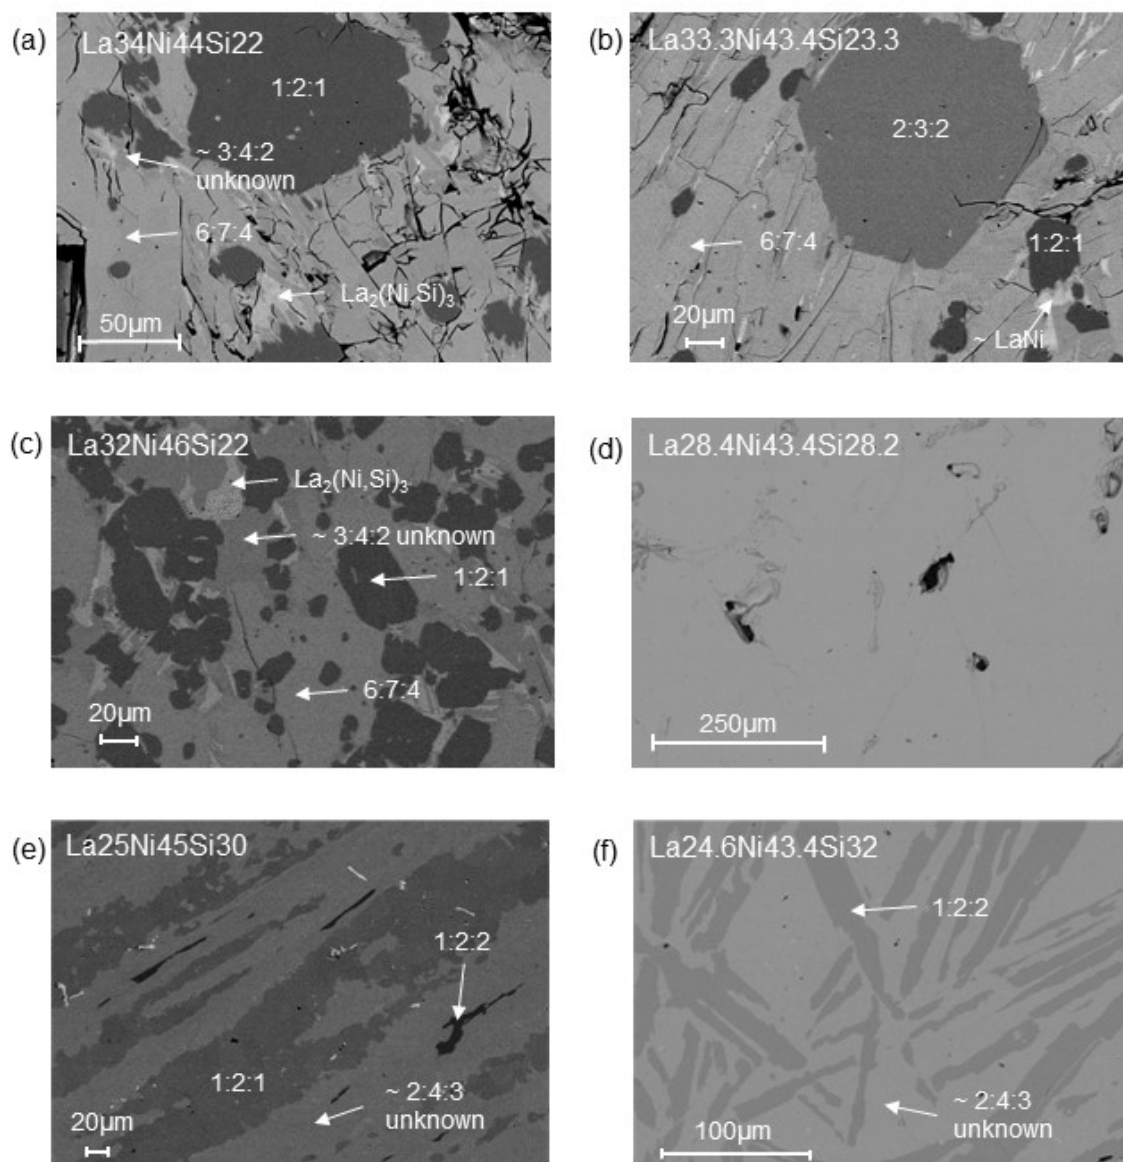

**Figure S1.** SEM images [backscattered electron (BSE) mode] showing the complex microstructure and multiphase appearance of samples. According to the numbering of Table 1, the nominal compositions are  $\text{La}_{34}\text{Ni}_{44}\text{Si}_{22}$  [sample 3 (a)],  $\text{La}_{33.3}\text{Ni}_{43.4}\text{Si}_{23.3}$  [sample 4 (b)],  $\text{La}_{32}\text{Ni}_{46}\text{Si}_{22}$  [sample 5 (c)],  $\text{La}_{28.4}\text{Ni}_{43.4}\text{Si}_{28.2}$  [sample 6 (d)],  $\text{La}_{25}\text{Ni}_{45}\text{Si}_{30}$  [sample 8 (e)] and  $\text{La}_{24.6}\text{Ni}_{43.4}\text{Si}_{32}$  [sample 9 (f)]. In each sample, the composition (La:Ni:Si at. %) of the different phases present is highlighted.

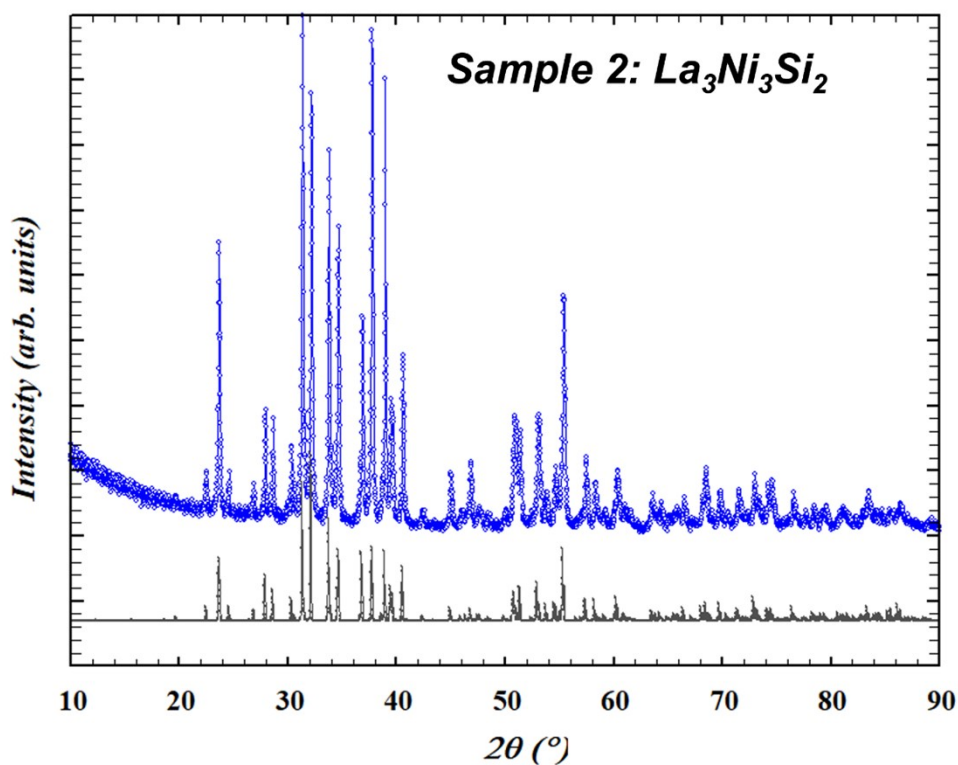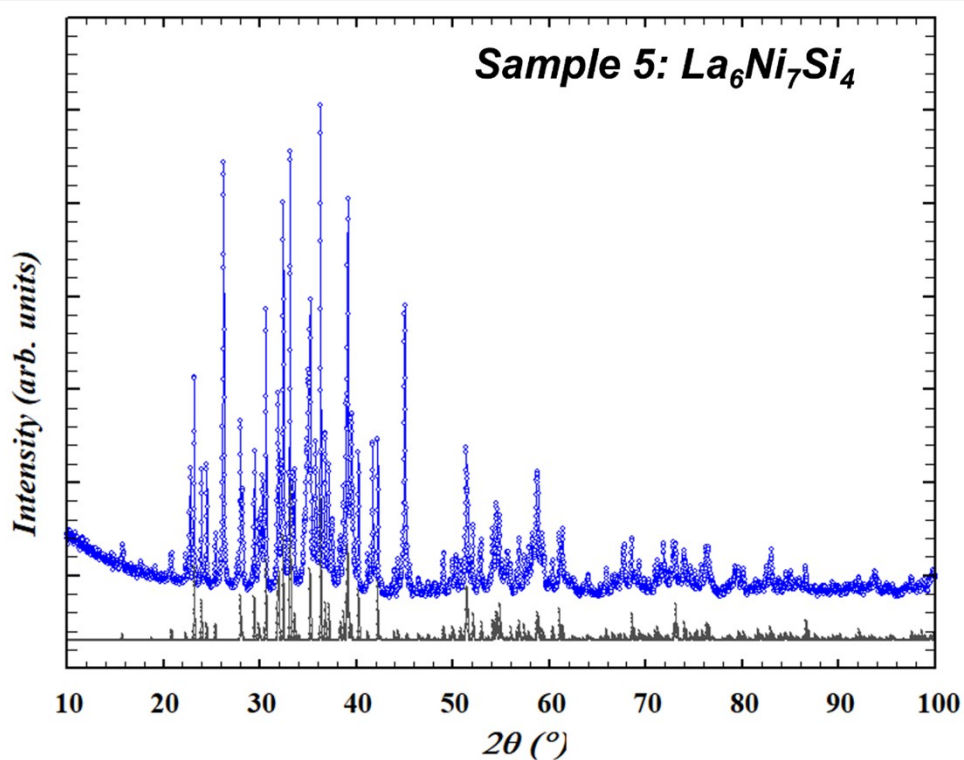

**Figure S2.** Top: powder pattern of sample 2 (nominal composition at. % La 37.5, Ni 37.5, Si 25.0), showing in blue and grey, respectively, the experimental and the calculated curves of the  $\text{La}_3\text{Ni}_3\text{Si}_2$  compound. No additional phases are present. Bottom: powder pattern of sample 5, having nominal composition  $\text{La}_{32}\text{Ni}_{46}\text{Si}_{22}$  and containing the  $\text{La}_6\text{Ni}_7\text{Si}_4$  compound as main phase;  $\text{LaNi}_2\text{Si}$ ,  $\approx \text{La}_3\text{Ni}_4\text{Si}_2$  (yet unknown) and  $\text{La}_2(\text{Ni},\text{Si})_3$  are present as secondary phases. The simulated pattern of the main phase is reported for comparison.

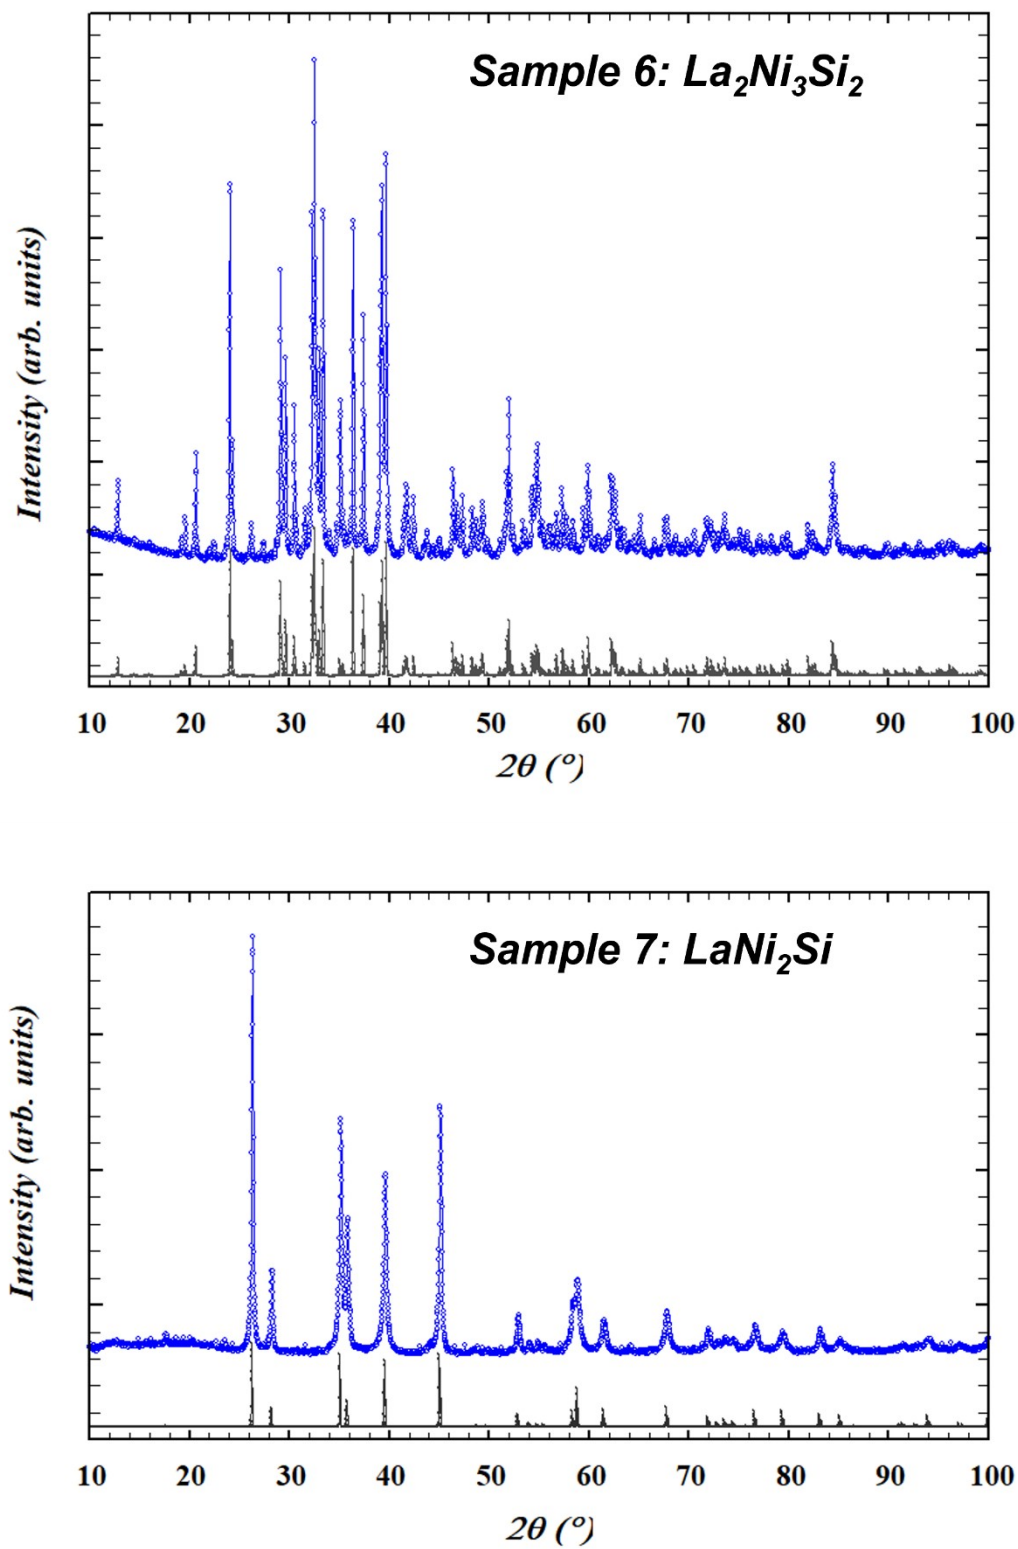

**Figure S3.** Top: powder pattern of sample 6 (nominal composition at. % La 28.4, Ni 43.4, Si 28.2), showing in blue and grey, respectively, the experimental and the calculated curves of the  $\text{La}_2\text{Ni}_3\text{Si}_2$  compound. A few additional weak peaks are due to an impurity phase. Bottom: powder pattern of sample 7 (nominal composition at. % La 25, Ni 50, Si 25.0), almost single phase of the  $\text{LaNi}_2\text{Si}$  compound; the simulated pattern is represented in grey.

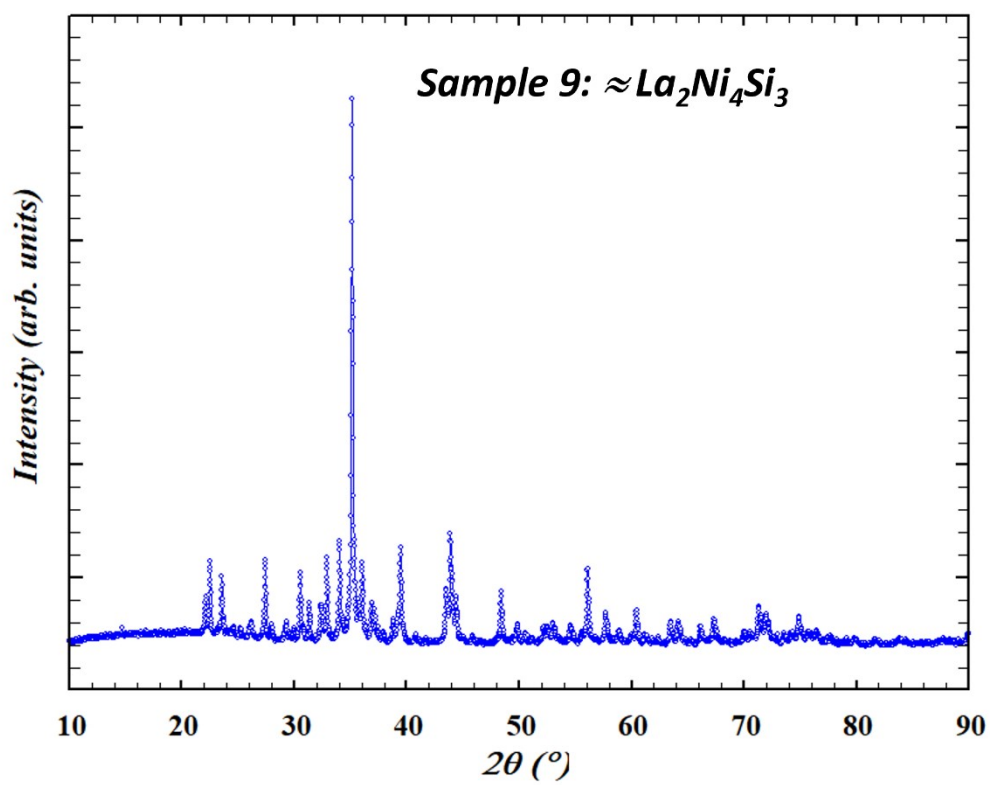

**Figure S4.** Powder pattern of sample 9 (nominal composition  $\text{La}_{24.6}\text{Ni}_{43.4}\text{Si}_{32}$ ), containing the compound with approximate composition  $\text{La}_2\text{Ni}_4\text{Si}_3$  (unknown structure), as predominant phase.

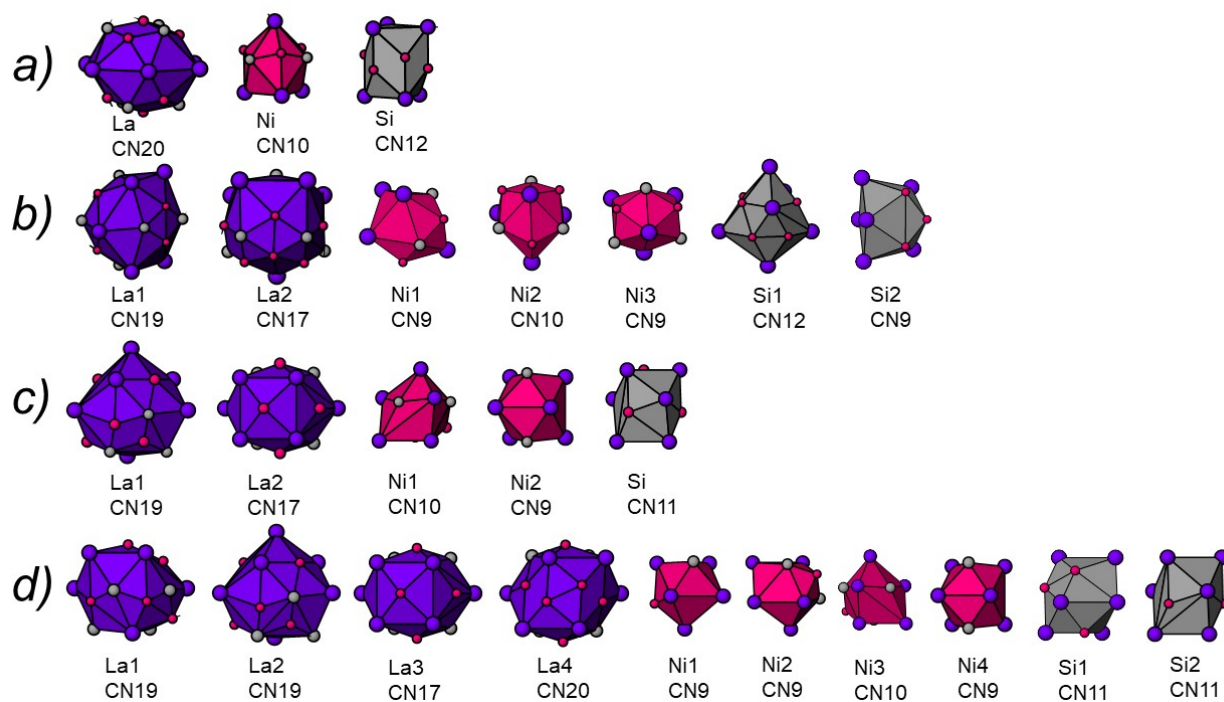

**Figure S5.** Coordination polyhedra in the crystal structures of  $\text{LaNi}_2\text{Si}$  (a),  $\text{La}_2\text{Ni}_3\text{Si}_2$  (b),  $\text{La}_3\text{Ni}_3\text{Si}_2$  (c) and  $\text{La}_6\text{Ni}_7\text{Si}_4$  (d). La, Ni and Si atoms are represented in violet, pink and grey, respectively.

**Table S1.** Details of the single crystal X-ray data collection and structure refinements of LaNi<sub>2</sub>Si, La<sub>2</sub>Ni<sub>3</sub>Si<sub>2</sub>, La<sub>6</sub>Ni<sub>7</sub>Si<sub>4</sub> and La<sub>3</sub>Ni<sub>3</sub>Si<sub>2</sub> (T = 295 K).

| Compound                                                                              | LaNi <sub>2</sub> Si                                          | La <sub>2</sub> Ni <sub>3</sub> Si <sub>2</sub>                                             | La <sub>6</sub> Ni <sub>7</sub> Si <sub>4</sub>                    | La <sub>3</sub> Ni <sub>3</sub> Si <sub>2</sub>                      |
|---------------------------------------------------------------------------------------|---------------------------------------------------------------|---------------------------------------------------------------------------------------------|--------------------------------------------------------------------|----------------------------------------------------------------------|
| La:Ni:Si [composition in at.%]                                                        | 25 : 50 : 25                                                  | 28.6 : 42.8 : 28.6                                                                          | 35.3 : 41.2 : 23.5                                                 | 37.5 : 37.5 : 25                                                     |
| Isotypic crystal                                                                      | SrCu <sub>2</sub> Ga                                          | Own structure                                                                               | Pr <sub>6</sub> Ni <sub>7</sub> Si <sub>4</sub>                    | Ce <sub>3</sub> Rh <sub>3</sub> Si <sub>2</sub>                      |
| Formula weight [g/mol]                                                                | 284.42                                                        | 510.13                                                                                      | 1357.79                                                            | 649.04                                                               |
| Crystal system                                                                        | Rhombohedral                                                  | Monoclinic                                                                                  | Orthorhombic                                                       | Orthorhombic                                                         |
| Pearson symbol                                                                        | <i>hR12</i>                                                   | <i>mP28</i>                                                                                 | <i>oP68</i>                                                        | <i>oP32</i>                                                          |
| Space group                                                                           | <i>R</i> <sup>3</sup> <i>m</i> (No. 166)                      | <i>P2</i> <sub>1</sub> / <i>c</i> (No. 14)                                                  | <i>Pbcm</i> (No. 57)                                               | <i>Pnma</i> (No. 62)                                                 |
| Unit formula per cell, Z                                                              | 3                                                             | 4                                                                                           | 4                                                                  | 4                                                                    |
| Lattice parameters [Å, °]                                                             | <i>a</i> = 4.0263(3)<br><i>c</i> = 15.066(2)                  | <i>a</i> = 6.8789(7)<br><i>b</i> = 6.2167(3)<br><i>c</i> = 12.214(1)<br><i>β</i> = 90.92(1) | <i>a</i> = 6.066(1)<br><i>b</i> = 7.488(1)<br><i>c</i> = 29.682(5) | <i>a</i> = 7.501(2)<br><i>b</i> = 14.316(4)<br><i>c</i> = 6.1485(16) |
| Unit cell volume [Å <sup>3</sup> ]                                                    | 211.48(4)                                                     | 522.24(9)                                                                                   | 1348.2(4)                                                          | 660.3(3)                                                             |
| Calc. density, ρ [g/cm <sup>3</sup> ]                                                 | 6.70                                                          | 6.49                                                                                        | 6.68                                                               | 6.53                                                                 |
| Absorption coefficient, μ [mm <sup>-1</sup> ]                                         | 28.15                                                         | 26.91                                                                                       | 28.37                                                              | 27.58                                                                |
| <i>F</i> (000)                                                                        | 381                                                           | 904                                                                                         | 2376                                                               | 1132                                                                 |
| Crystal shape                                                                         | Elongated prism                                               | Platelet                                                                                    | Block                                                              | Block                                                                |
| Crystal size [μm]                                                                     | 50 × 80 × 160                                                 | 50 × 100 × 120                                                                              | 70 × 70 × 80                                                       | 60 × 70 × 80                                                         |
| Scan mode                                                                             | ω-θ                                                           | ω-θ                                                                                         | ω-θ                                                                | ω-θ                                                                  |
| Theta range [°]                                                                       | 2 ≤ θ ≤ 32                                                    | 2 ≤ θ ≤ 30                                                                                  | 2.5 ≤ θ ≤ 33.5                                                     | 3.6 ≤ θ ≤ 31.4                                                       |
| Ranges of <i>h</i> , <i>k</i> , <i>l</i>                                              | -6 ≤ <i>h</i> ≤ 6<br>-6 ≤ <i>k</i> ≤ 6<br>-22 ≤ <i>l</i> ≤ 22 | 0 ≤ <i>h</i> ≤ 9<br>-8 ≤ <i>k</i> ≤ 8<br>-17 ≤ <i>l</i> ≤ 17                                | -9 ≤ <i>h</i> ≤ 9<br>-11 ≤ <i>k</i> ≤ 11<br>-44 ≤ <i>l</i> ≤ 44    | -10 ≤ <i>h</i> ≤ 10<br>-20 ≤ <i>k</i> ≤ 19<br>-8 ≤ <i>l</i> ≤ 8      |
| Number of collected reflections                                                       | 970                                                           | 3300                                                                                        | 26857                                                              | 6347                                                                 |
| Number of independent reflections                                                     | 116                                                           | 1512                                                                                        | 2503                                                               | 1054                                                                 |
| Reflections with <i>F</i> <sub>0</sub> > 4σ ( <i>F</i> <sub>0</sub> )                 | 103                                                           | 1080                                                                                        | 1995                                                               | 1044                                                                 |
| Absorption correction method                                                          | ψ-scans, sphere                                               | ψ-scans, sphere                                                                             | multiscan                                                          | multiscan                                                            |
| Solution method                                                                       | Patterson                                                     | Direct Methods                                                                              | Intrinsic Phasing                                                  | Intrinsic Phasing                                                    |
| Number of refined parameters                                                          | 9                                                             | 65                                                                                          | 81                                                                 | 41                                                                   |
| <i>R</i> <sub>1</sub> <sup>a</sup>                                                    | 0.012                                                         | 0.032                                                                                       | 0.029                                                              | 0.022                                                                |
| w <i>R</i> <sub>2</sub> <sup>b</sup> ( <i>F</i> <sub>0</sub> <sup>2</sup> ), all data | 0.034                                                         | 0.064                                                                                       | 0.053                                                              | 0.055                                                                |
| <i>R</i> <sub>int</sub> <sup>c</sup> ( <i>F</i> <sub>0</sub> <sup>2</sup> )           | 0.059                                                         | 0.044                                                                                       | 0.046                                                              | 0.040                                                                |
| Goodness-of-fit on <i>F</i> <sub>0</sub> <sup>2</sup>                                 | 1.273                                                         | 0.920                                                                                       | 0.923                                                              | 1.249                                                                |
| Secondary extinction correction <i>x</i>                                              | 0.026(2)                                                      | 0.0078(2)                                                                                   | –                                                                  | 0.0052(3)                                                            |

<sup>a</sup>  $R_1(F) = \left[ \frac{\sum (|F_o| - |F_c|)}{\sum |F_o|} \right]$ , <sup>b</sup>  $wR_2(F^2) = \left[ \frac{\sum w(F_o^2 - F_c^2)^2}{\left[ \sum w(F_o^2)^2 \right]^{1/2}} \right]^{1/2}$ , *w* is a weight function different for each compound;

<sup>c</sup>  $R_{int}(F_o^2) = \left[ \frac{\sum |F_o^2 - \bar{F}_o^2|}{\sum F_o^2} \right] / n$ , is an internal agreement index quantifying the deviation of *n* equivalent intensities from the average value.

**Table S2.** Structure types adopted by lanthanide or alkaline earth ternary intermetallics with 1:2:1 stoichiometry: crystal data, number and representatives of each family.<sup>2</sup>

| Structure Type                                                               | Pearson Code – Space Group            | Wyckoff letters            | Lattice Parameters [Å]                 | Number | Representatives                                                                                                                                                                                                                                                                                                                                                                                                                                                                                                                                                                                                                                                                                                                                                                                                                             |
|------------------------------------------------------------------------------|---------------------------------------|----------------------------|----------------------------------------|--------|---------------------------------------------------------------------------------------------------------------------------------------------------------------------------------------------------------------------------------------------------------------------------------------------------------------------------------------------------------------------------------------------------------------------------------------------------------------------------------------------------------------------------------------------------------------------------------------------------------------------------------------------------------------------------------------------------------------------------------------------------------------------------------------------------------------------------------------------|
| BaLi <sub>2</sub> Si                                                         | <i>oP8 – Pmmn</i>                     | 4e, 2b, 2a                 | a = 4.74<br>b = 6.75<br>c = 6.25       | 3      | KLi <sub>2</sub> As<br>BaNi <sub>2</sub> Ge                                                                                                                                                                                                                                                                                                                                                                                                                                                                                                                                                                                                                                                                                                                                                                                                 |
| PrCo <sub>2</sub> Ga                                                         | <i>oP8 – Pmma</i>                     | 2 x 2f, 2e, 2a             | a = 5.021<br>b = 4.043<br>c = 6.860    | 15     | RCo <sub>2</sub> Ga, R=La,Pr,Nd<br>RCo <sub>2</sub> In, R=Pr-Sm,Gd-Ho,Y<br>RNi <sub>2</sub> In, R=La,Pr,Nd<br>LaCo <sub>2.17</sub> Zn <sub>0.83</sub>                                                                                                                                                                                                                                                                                                                                                                                                                                                                                                                                                                                                                                                                                       |
| GdPt <sub>2</sub> Sn<br>(or ZrPt <sub>2</sub> Al)                            | <i>hP8 – P6<sub>3</sub>/mmc</i>       | 4f, 2c, 2a                 | a = 4.532<br>c = 9.065                 | 29     | RNi <sub>2</sub> Sb, RPt <sub>2</sub> Al, R=Zr,Hf<br>RPd <sub>2</sub> In, R=La, Ce<br>RPt <sub>2</sub> In, R=Ce,Gd,Tb-Ho,U<br>RPt <sub>2</sub> Sn, R=Gd,Tb,Er-Lu, Y, U<br>UT <sub>2</sub> Sn, T=Cu,Au<br>RLi <sub>2</sub> Ge, R=La,Ce<br>CaNi <sub>2</sub> Si, RNi <sub>2</sub> Ge, R=Sr,Pr,Nd<br>LaCu <sub>2</sub> Mg, MgAu <sub>2</sub> Ga                                                                                                                                                                                                                                                                                                                                                                                                                                                                                                |
| CeLi <sub>2</sub> Ge<br>(or AlCr <sub>2</sub> C<br>or LiCu <sub>2</sub> Sn)  | <i>hP8 – P6<sub>3</sub>/mmc</i>       | 4f, 2c, 2a                 | a = 4.537<br>c = 7.568                 | 4      | RLi <sub>2</sub> Ge, R=La-Nd                                                                                                                                                                                                                                                                                                                                                                                                                                                                                                                                                                                                                                                                                                                                                                                                                |
| SrCu <sub>2</sub> Ga                                                         | <i>hR12 – R<math>\bar{3}m</math></i>  | 6c, 3b, 3a                 | a = 4.271<br>c = 15.925                | 3      | BaCu <sub>2</sub> Ga<br>LaNi <sub>2</sub> Si                                                                                                                                                                                                                                                                                                                                                                                                                                                                                                                                                                                                                                                                                                                                                                                                |
| CePt <sub>2</sub> B                                                          | <i>hP12 – P6<sub>2</sub>22</i>        | 6i,3d,3c                   | a = 5.4811<br>c = 7.8830               | 7      | RPt <sub>2</sub> B, R=La-Nd,Tm,Lu,Y                                                                                                                                                                                                                                                                                                                                                                                                                                                                                                                                                                                                                                                                                                                                                                                                         |
| YPd <sub>2</sub> Si<br>(Fe <sub>3</sub> C der.)                              | <i>oP16 – Pnma</i>                    | 8d, 2 x 4c                 | a = 7.300<br>b = 6.927<br>c = 5.499    | 62     | RPd <sub>2</sub> Ga, R=La-Sm,Gd-Dy,Y<br>RPd <sub>2</sub> Si, RPd <sub>2</sub> Ge, R=La-Lu,Y<br>RNi <sub>2</sub> Si, R=Tb,Dy,Er,Tm,Y<br>RPt <sub>2</sub> Si, R=Gd-Lu,Y<br>MgNi <sub>2</sub> P, UAu <sub>2</sub> Al<br>RPd <sub>2</sub> Al, R=Ce-Pr<br>CaCd <sub>2</sub> X, X=Pd,Pt<br>CaMg <sub>2</sub> X, X=Rh,Pd,Pt                                                                                                                                                                                                                                                                                                                                                                                                                                                                                                                        |
| EuAl <sub>2</sub> Ge                                                         | <i>oP16 – Pnma</i>                    | 4 x 4c                     | a = 7.294<br>b = 4.306<br>c = 11.237   | 1      |                                                                                                                                                                                                                                                                                                                                                                                                                                                                                                                                                                                                                                                                                                                                                                                                                                             |
| CeRh <sub>2</sub> Si<br>(CeNiSi <sub>2</sub> -type<br>occupation<br>variant) | <i>oS16 – Cmcm</i>                    | 4 x 4c                     | a = 4.0413<br>b = 17.730<br>c = 4.0675 | 3      | RPt <sub>2</sub> Si, R=Ce,Eu                                                                                                                                                                                                                                                                                                                                                                                                                                                                                                                                                                                                                                                                                                                                                                                                                |
| YPd <sub>2</sub> Sn<br>(MnCu <sub>2</sub> Al<br>Heusler phase)               | <i>cF16 – Fm<math>\bar{3}m</math></i> | 8c, 4b, 4a                 | a = 6.7144                             | ~200   | RMg <sub>2</sub> Cu, R=Ce,Tb<br>RMg <sub>2</sub> Ag, R=La-Gd<br>RMg <sub>2</sub> Zn, R=Pr,Nd<br>LiCa <sub>2</sub> X, X=Ti,Si,Ge<br>MgNi <sub>2</sub> X, X=Sn,Sb<br>MgPd <sub>2</sub> X, X=Ga,Sb<br>MgM <sub>2</sub> In, M=Li,Ni,Pd<br>MgLi <sub>2</sub> X, X=Ga,In,Tl,Ge,Sn,Sb,Bi,Ag,Au,Zn,Cd,Hg<br>ScM <sub>2</sub> Ga, M=Ni,Pd,Cu<br>ScM <sub>2</sub> Al, M=Cu,Ag,Au,Ni,Pd,Pt<br>ScM <sub>2</sub> In, M=Ni,Pt<br>ScM <sub>2</sub> Sn, M=Pt,Rh<br>ScCo <sub>2</sub> X, X=Ga,Ge,Sn<br>RPd <sub>2</sub> In, R=Gd,Dy,Er-Lu,Sc,Y<br>RM <sub>2</sub> In, R= La-Lu,Sc,Y; M=Cu,Ag,Au<br>RPd <sub>2</sub> Tl, R=Sm-Er,Y<br>RNi <sub>2</sub> Sn, R=Yb,Lu,Sc<br>RPd <sub>2</sub> Sn, R=Gd-Lu,Sc,Y<br>RPd <sub>2</sub> Pb, R=Pr,Sm-Lu,Sc,Y<br>RPd <sub>2</sub> Sb, R=Gd-Er,Yb,Y<br>RPd <sub>2</sub> Bi, R=Pr,Sm-Er,Y<br>RZn <sub>2</sub> Mg, R=Ce, Tb |
| YRh <sub>2</sub> Si<br>(CeNi <sub>3</sub> der.)                              | <i>hP24 – P6<sub>3</sub>/mmc</i>      | 12k, 4f, 2d, 2c,<br>2b, 2a | a = 5.495<br>c = 15.030                | 14     | RCo <sub>2</sub> Zn, R=La,Ce,Sm<br>RNi <sub>2</sub> Zn, R=La,Ce<br>RRh <sub>2</sub> Si, R=Er,Y;<br>RRh <sub>2</sub> Ge, R=Sm,Er,Y<br>SmCo <sub>2</sub> Ga, LuNi <sub>2</sub> Ga, TbFe <sub>2</sub> -Ga                                                                                                                                                                                                                                                                                                                                                                                                                                                                                                                                                                                                                                      |
| DyB <sub>2</sub> C                                                           | <i>tP32 – P4<sub>2</sub>/mbc</i>      | 8g, 3 x 8h                 | a = 6.791<br>c = 7.522                 | 9      | RB <sub>2</sub> C, R=Tb-Lu,Sc,Y                                                                                                                                                                                                                                                                                                                                                                                                                                                                                                                                                                                                                                                                                                                                                                                                             |
| CeIr <sub>2</sub> Si                                                         | <i>tI32 – I4<sub>1</sub>/amd</i>      | 3 x 8e, 4b, 4a             | a = 4.0698<br>c = 35.408               | 4      | RRh <sub>2</sub> Si, RIr <sub>2</sub> Si, R=La,Ce                                                                                                                                                                                                                                                                                                                                                                                                                                                                                                                                                                                                                                                                                                                                                                                           |

**Table S3.** Atomic coordinates for the VASP optimizations based on the  $\text{CaNi}_2\text{Si}$  structure (*hP8*).

| Atom  | Site | $x$           | $y$           | $z$           |
|-------|------|---------------|---------------|---------------|
| Ca/La | $2c$ | $\frac{1}{3}$ | $\frac{2}{3}$ | $\frac{1}{4}$ |
| Ni    | $4f$ | $\frac{1}{3}$ | $\frac{2}{3}$ | 0.96051       |
| Si    | $2a$ | 0             | 0             | 0             |

$a = 4.004, c = 9.886 \text{ \AA}$ .
